# Supplementary material
Source: PubMed Central journal article supplement (PMC3446854)
Supplement: NIHMS394940-supplement-1.pdf [file NIHMS394940-supplement-1.pdf]

**SUPPLEMENTARY INFORMATION****Index**

**Supplementary Table 1:** Clinical characteristics of human hepatocellular carcinoma samples.

Page 3

**Supplementary Table 2:** Clinical Characteristics of 5 public HCC datasets.

Page 5

**Supplementary Table 3:** Wnt-pathway mRNA list: 210 Wnt-related genes from the literature.

Page 6

**Supplementary Table 4:** Wnt-pathway miRNA list: 49 Wnt-related miRNAs from the literature.

Page 12

**Supplementary Table 5:** Significantly differentially expressed Wnt-related genes in CTNNB1- and Wnt-TGF $\beta$ -class samples of the training set.

Page 15

**Supplementary Table 6:** Summary of dysregulated CTNNB1- and Wnt-TGF $\beta$ -Wnt-genes according to their cellular localization and their known or suspected function.

Page 17

**Supplementary Table 7:** Expression of known liver-related Wnt-target-genes.

Page 19

**Supplementary Table 8:** Correlation of Wnt-related transcription factors to Wnt-target-genes in the training set.

Page 20

**Supplementary Table 9:** Frequency  $\beta$ catenin IHC positive samples and CTNNB1 mutations Wnt-related and non-Wnt-related subclasses of HCC in the in training (T) and validation (V) sets.

Page 21

**Supplementary Table 10:** Differentially expressed Wnt-related-miRNAs in 89 HCC samples of the training set.

Page 22

|                                                                                                                                                                                                                                       |         |
|---------------------------------------------------------------------------------------------------------------------------------------------------------------------------------------------------------------------------------------|---------|
| <b>Supplementary Table 11:</b> Enrichment of samples identified by CTNNB1-, Wnt-TGF $\beta$ WntGenes- and <i>CTNNB1</i> -mutation-signature in CTNNB1 and Wnt-TGF $\beta$ subclasses in 5 independent datasets (Fisher's Exact Test). | Page 23 |
| <b>Supplementary Table 12:</b> 21 Liver Cancer cell lines analyzed by GSEA for gene expression profiles similar to either CTNNB1 or Wnt-TGF $\beta$ class.                                                                            | Page 24 |
| <b>Supplementary Figure 1</b>                                                                                                                                                                                                         | Page 25 |
| <b>Supplementary Figure 2</b>                                                                                                                                                                                                         | Page 26 |
| <b>Supplementary Figure 3</b>                                                                                                                                                                                                         | Page 27 |
| <b>Supplementary Figure 4</b>                                                                                                                                                                                                         | Page 28 |
| <b>Supplementary Figure 5</b>                                                                                                                                                                                                         | Page 29 |
| <b>Supplementary Figure 6</b>                                                                                                                                                                                                         | Page 30 |
| <b>Supplementary Figure 7</b>                                                                                                                                                                                                         | Page 31 |
| <b>Supplementary Figure Legends</b>                                                                                                                                                                                                   | Page 32 |
| <b>Supplementary Material and Methods</b>                                                                                                                                                                                             | Page 34 |
| <b>Supplementary References</b>                                                                                                                                                                                                       | Page 35 |

**Supplementary Table 1:** Clinical characteristics of human hepatocellular carcinoma samples.

|                                           | Training Set (1) | Validation Set (2) |
|-------------------------------------------|------------------|--------------------|
| <b>Gender</b>                             |                  |                    |
| Male                                      | 64 (70.3%)       | 121 (73.8%)        |
| Female                                    | 27 (29.7%)       | 43 (26.2%)         |
| <b>Ethnicity</b>                          |                  |                    |
| Caucasian                                 | 74 (81.3%)       | 129 (78.7%)        |
| Asian                                     | 4 (4.4%)         | 29 (17.7%)         |
| African-American                          | 4 (4.4%)         | 5 (3%)             |
| Not known                                 | 9 (9.9%)         | 1 (0.6%)           |
| Median Age (range)                        | 65 (42-80)       | 67 (36-83)         |
| <b>Etiology</b>                           |                  |                    |
| HCV                                       | 91 (100%)        | 77 (47%)           |
| HBV                                       | 0 (0%)           | 45 (27.4%)         |
| Alcohol                                   | 0 (0%)           | 12 (7.3%)          |
| Other                                     | 0 (0%)           | 24 (14.6%)         |
| Not known                                 | 0 (0%)           | 6 (3.7%)           |
| <b>Grade of tumor differentiation</b>     |                  |                    |
| well differentiated                       | 20 (22%)         | 29 (17.7%)         |
| moderate differentiated                   | 43 (47.2%)       | 63 (38.4%)         |
| poorly differentiated                     | 18 (19.8%)       | 16 (9.8%)          |
| Not known                                 | 10 (11%)         | 56 (34.1%)         |
| Median Diameter of largest<br>nodule (cm) | 3.5 (1-22)       | 3.5 (0.7-13)       |
| <b>BCLC stage</b>                         |                  |                    |
| 0                                         | 7 (7.7%)         | 18 (11%)           |

|           |            |             |
|-----------|------------|-------------|
| A         | 60 (65.9%) | 133 (81.1%) |
| B         | 6 (6.6%)   | 9 (5.5%)    |
| C         | 8 (8.8%)   | 1 (0.6%)    |
| Not known | 10 (11%)   | 3 (1.8%)    |

**Supplementary Table 2:** Clinical characteristics of 5 public HCC datasets.

|                 | HCC-I                           | HCC-II                               | HCC-III                        | HCC-IV                               | HCC-V                                |
|-----------------|---------------------------------|--------------------------------------|--------------------------------|--------------------------------------|--------------------------------------|
| Samples (n=)    | 90                              | 82                                   | 60                             | 57                                   | 118                                  |
| Gender (male %) | 79%                             | na                                   | 73%                            | 82%                                  | 81%                                  |
| Age             | 53 (12)                         | na                                   | 63                             | 62 (14)                              | 58 (9)                               |
| Etiology        |                                 |                                      |                                |                                      |                                      |
| HBV             | 59%                             | 83%                                  | 18%                            | 30%                                  | 23%                                  |
| HCV             | 9%                              | 5%                                   | 67%                            | 19%                                  | 69%                                  |
| HBV+HCV         | 3%                              | -                                    | -                              | -                                    | 1%                                   |
| Alcohol         | 6%                              | -                                    | -                              | 32%                                  | 3%                                   |
| Others          | 4%                              | 11%                                  | 15%                            | -                                    | -                                    |
| Histology       | G2/3/4 <sup>#</sup><br>8/31/1   | na                                   | G1/2/3 <sup>#</sup><br>4/45/10 | G1/2/3/4 <sup>#</sup><br>7/51/35/7   | W/M/P*<br>24/65/16                   |
| Reference       | Lee et al.<br>Nat Genet<br>2004 | Chen et al.<br>Mol Biol Cell<br>2002 | Izuka et al.<br>Lancet<br>2003 | Boyault et al.<br>Hepatology<br>2007 | Hoshida et al.<br>Cancer Res<br>2009 |

HBV: hepatitis B virus, HCV: hepatitis C virus,

<sup>#</sup>: Edmonson-Steiner grade, \*: UICC tumor differentiation (well/moderate/poor),  
Mean (SD, if available)

Origin of HCC-datasets: HCC-I (GSE1528), HCC-II ([http://smd.stanford.edu/cgi-bin/publication/viewPublication.pl?pub\\_no=107](http://smd.stanford.edu/cgi-bin/publication/viewPublication.pl?pub_no=107)), HCC-III (<http://surgery2.med.yamaguchi-u.ac.jp/research/DNAchip/hcc-recurrence/index.html>), HCC-IV (E-TABM-36) and HCC-V (GSE10186).

**Supplementary Table 3:** Wnt-pathway mRNA list: 210 Wnt-related genes from the literature (see main manuscript Materials and Methods for details).

| Symbol  | Gene ID | Description                                                             |
|---------|---------|-------------------------------------------------------------------------|
| AKT1    | 207     | v-akt murine thymoma viral oncogene homolog 1                           |
| AKT2    | 208     | V-akt murine thymoma viral oncogene homolog 2, mRNA                     |
| AKT3    | 10000   | v-akt murine thymoma viral oncogene homolog 3 (protein kinase B, gamma) |
| ANKRD6  | 22881   | ankyrin repeat domain 6                                                 |
| APC     | 324     | adenomatous polyposis coli                                              |
| APC2    | 10297   | adenomatosis polyposis coli 2                                           |
| ARRB1   | 408     | arrestin, beta 1                                                        |
| ARRB2   | 409     | arrestin, beta 2                                                        |
| AXIN1   | 8312    | axin 1                                                                  |
| AXIN2   | 8313    | axin 2                                                                  |
| BRD7    | 29117   | bromodomain containing 7                                                |
| BTRC    | 8945    | beta-transducin repeat containing                                       |
| PGEA1   | 25776   | (CBY1) chibby homolog 1 (Drosophila)                                    |
| CACYBP  | 27101   | calcyclin binding protein                                               |
| CAMK2A  | 815     | calcium/calmodulin-dependent protein kinase II alpha                    |
| CAMK2B  | 816     | calcium/calmodulin-dependent protein kinase II beta                     |
| CAMK2D  | 817     | calcium/calmodulin-dependent protein kinase II delta                    |
| CAMK2G  | 818     | calcium/calmodulin-dependent protein kinase II gamma                    |
| CCND1   | 595     | cyclin D1                                                               |
| CCND2   | 894     | cyclin D2                                                               |
| CCND3   | 896     | Cyclin D3 (CCND3), transcript variant 3, mRNA                           |
| CDC2    | 983     | cell division cycle 2, G1 to S and G2 to M                              |
| CDC25C  | 995     | cell division cycle 25 homolog C (S. pombe)                             |
| CDH1    | 999     | cadherin 1, type 1, E-cadherin (epithelial)                             |
| CDX1    | 1044    | caudal type homeobox 1                                                  |
| CER1    | 9350    | cerberus 1, cysteine knot superfamily, homolog (Xenopus laevis)         |
| CHD8    | 57680   | chromodomain helicase DNA binding protein 8                             |
| CHP     | 11261   | calcium binding protein P22                                             |
| CREBBP  | 1387    | CREB binding protein                                                    |
| CSNK1A1 | 1452    | Homo sapiens, clone IMAGE:4769127, mRNA                                 |
| CSNK1D  | 1453    | casein kinase 1, delta                                                  |
| CSNK1E  | 1454    | casein kinase 1, epsilon                                                |
| CSNK2A1 | 1457    | casein kinase 2, alpha 1 polypeptide                                    |
| CSNK2A2 | 1459    | casein kinase 2, alpha prime polypeptide                                |
| CSNK2B  | 1460    | casein kinase 2, beta polypeptide                                       |
| CTBP1   | 1487    | C-terminal binding protein 1                                            |
| CTBP2   | 1488    | C-terminal binding protein 2                                            |
| CTNNB1  | 1499    | catenin (cadherin-associated protein), beta 1, 88kDa                    |

|          |       |                                                                |
|----------|-------|----------------------------------------------------------------|
| CTNNBIP1 | 56998 | catenin, beta interacting protein 1                            |
| CUL1     | 8454  | cullin 1                                                       |
| CXXC4    | 80319 | CXXC finger 4                                                  |
| DAAM1    | 23002 | dishevelled associated activator of morphogenesis 1            |
| DAAM2    | 23500 | dishevelled associated activator of morphogenesis 2            |
| DAB2     | 1601  | Differentially expressed protein                               |
| DACT1    | 51339 | dapper, antagonist of beta-catenin, homolog 1 (Xenopus laevis) |
| CCDC85B  | 11007 | coiled-coil domain containing 85B                              |
| DKK1     | 22943 | dickkopf homolog 1 (Xenopus laevis)                            |
| DKK2     | 27123 | dickkopf homolog 2 (Xenopus laevis)                            |
| DKK3     | 27122 | dickkopf homolog 3 (Xenopus laevis)                            |
| DKK4     | 27121 | dickkopf homolog 4 (Xenopus laevis)                            |
| DLG1     | 1739  | discs, large homolog 1 (Drosophila)                            |
| DLG2     | 1740  | discs, large homolog 2 (Drosophila)                            |
| DLG4     | 1742  | discs, large homolog 4 (Drosophila)                            |
| DVL1     | 1855  | dishevelled, dsh homolog 1 (Drosophila)                        |
| DVL2     | 1856  | dishevelled, dsh homolog 2 (Drosophila)                        |
| DVL3     | 1857  | dishevelled, dsh homolog 3 (Drosophila)                        |
| EP300    | 2033  | E1A binding protein p300                                       |
| FBXW11   | 23291 | F-box and WD repeat domain containing 11                       |
| FBXW2    | 26190 | F-box and WD repeat domain containing 2                        |
| FOSL1    | 8061  | FOS-like antigen 1                                             |
| FRAT1    | 10023 | frequently rearranged in advanced T-cell lymphomas             |
| FRAT2    | 23401 | frequently rearranged in advanced T-cell lymphomas 2           |
| FSTL1    | 11167 | folliculin-like 1                                              |
| FZD1     | 8321  | frizzled homolog 1 (Drosophila)                                |
| FZD10    | 11211 | frizzled homolog 10 (Drosophila)                               |
| FZD2     | 2535  | frizzled homolog 2 (Drosophila)                                |
| FZD3     | 7976  | frizzled homolog 3 (Drosophila)                                |
| FZD4     | 8322  | frizzled homolog 4 (Drosophila)                                |
| FZD5     | 7855  | frizzled homolog 5 (Drosophila)                                |
| FZD6     | 8323  | frizzled homolog 6 (Drosophila)                                |
| FZD7     | 8324  | frizzled homolog 7 (Drosophila)                                |
| FZD8     | 8325  | frizzled homolog 8 (Drosophila)                                |
| FZD9     | 8326  | frizzled homolog 9 (Drosophila)                                |
| GSK3A    | 2931  | glycogen synthase kinase 3 alpha                               |
| GSK3B    | 2932  | glycogen synthase kinase 3 beta                                |
| HDAC1    | 3065  | histone deacetylase 1                                          |
| HIPK2    | 28996 | homeodomain interacting protein kinase 2                       |
| JUN      | 3725  | jun oncogene                                                   |
| RPSA     | 3921  | ribosomal protein SA                                           |
| LDLR     | 3949  | low density lipoprotein receptor                               |

|           |        |                                                                             |
|-----------|--------|-----------------------------------------------------------------------------|
| LEF1      | 51176  | lymphoid enhancer-binding factor 1                                          |
| LRP1      | 4035   | low density lipoprotein-related protein 1 (alpha-2-macroglobulin receptor)  |
| LRP5      | 4041   | low density lipoprotein receptor-related protein 5                          |
| LRP6      | 4040   | low density lipoprotein receptor-related protein 6                          |
| MAGI3     | 260425 | membrane associated guanylate kinase, WW and PDZ domain containing 3        |
| MAP1B     | 4131   | microtubule-associated protein 1B                                           |
| MAP3K4    | 4216   | mitogen-activated protein kinase kinase kinase 4                            |
| MAP3K7    | 6885   | mitogen-activated protein kinase kinase kinase 7                            |
| MAP3K7IP1 | 10454  | TGF-beta activated kinase 1/MAP3K7 binding protein 1                        |
| MAPK10    | 5602   | mitogen-activated protein kinase 10                                         |
| MAPK8     | 5599   | mitogen-activated protein kinase 8                                          |
| MAPK8IP1  | 9479   | mitogen-activated protein kinase 8 interacting protein 1                    |
| MAPK9     | 5601   | mitogen-activated protein kinase 9                                          |
| MARK2     | 2011   | MAP/microtubule affinity-regulating kinase 2                                |
| MMP7      | 4316   | matrix metalloproteinase 7 (matrilysin, uterine)                            |
| MVP       | 9961   | major vault protein                                                         |
| MYC       | 4609   | v-myc myelocytomatosis viral oncogene homolog (avian)                       |
| NFAT5     | 10725  | nuclear factor of activated T-cells 5, tonicity-responsive                  |
| NFATC1    | 4772   | nuclear factor of activated T-cells, cytoplasmic, calcineurin-dependent 1   |
| NFATC2    | 4773   | nuclear factor of activated T-cells, cytoplasmic, calcineurin-dependent 2   |
| NFATC3    | 4775   | nuclear factor of activated T-cells, cytoplasmic, calcineurin-dependent 3   |
| NFATC4    | 4776   | nuclear factor of activated T-cells, cytoplasmic, calcineurin-dependent 4   |
| NKD1      | 85407  | naked cuticle homolog 1 (Drosophila)                                        |
| NKD2      | 85409  | naked cuticle homolog 2 (Drosophila)                                        |
| NLK       | 51701  | nemo-like kinase                                                            |
| NR5A1     | 2516   | nuclear receptor subfamily 5, group A, member 1                             |
| PAFAH1B1  | 5048   | platelet-activating factor acetylhydrolase, isoform Ib, alpha subunit 45kDa |
| PAX2      | 5076   | paired box 2                                                                |
| PIAS4     | 51588  | protein inhibitor of activated STAT, 4                                      |
| PIN1      | 5300   | peptidylprolyl cis/trans isomerase, NIMA-interacting 1                      |
| PLAU      | 5328   | plasminogen activator, urokinase                                            |
| PLCB1     | 23236  | phospholipase C, beta 1 (phosphoinositide-specific)                         |
| PLCB2     | 5330   | phospholipase C, beta 2                                                     |
| PLCB3     | 5331   | phospholipase C, beta 3 (phosphatidylinositol-specific)                     |
| PLCB4     | 5332   | phospholipase C, beta 4                                                     |
| PORCN     | 64840  | porcupine homolog (Drosophila)                                              |
| PPARD     | 5467   | peroxisome proliferator-activated receptor delta                            |
| PPP2CA    | 5515   | protein phosphatase 2 (formerly 2A), catalytic subunit, alpha isoform       |
| PPP2CB    | 5516   | protein phosphatase 2 (formerly 2A), catalytic subunit, beta isoform        |
| PPP2R1A   | 5518   | protein phosphatase 2 (formerly 2A), regulatory subunit A, alpha isoform    |
| PPP2R1B   | 5519   | protein phosphatase 2 (formerly 2A), regulatory subunit A, beta isoform     |
| PPP2R2A   | 5520   | protein phosphatase 2 (formerly 2A), regulatory subunit B, alpha isoform    |



|          |        |                                                                          |
|----------|--------|--------------------------------------------------------------------------|
| PPP2R2B  | 5521   | protein phosphatase 2 (formerly 2A), regulatory subunit B, beta isoform  |
| PPP2R2C  | 5522   | protein phosphatase 2 (formerly 2A), regulatory subunit B, gamma isoform |
| PPP2R5B  | 5526   | protein phosphatase 2, regulatory subunit B', beta isoform               |
| PPP2R5C  | 5527   | protein phosphatase 2, regulatory subunit B', gamma isoform              |
| PPP2R5E  | 5529   | protein phosphatase 2, regulatory subunit B', epsilon isoform            |
| PPP3CA   | 5530   | protein phosphatase 3 (formerly 2B), catalytic subunit, alpha isoform    |
| PPP3CB   | 5532   | protein phosphatase 3 (formerly 2B), catalytic subunit, beta isoform     |
| PPP3CC   | 5533   | protein phosphatase 3 (formerly 2B), catalytic subunit, gamma isoform    |
| PPP3R1   | 5534   | protein phosphatase 3, regulatory subunit B, alpha                       |
| PPP3R2   | 5535   | protein phosphatase 3 (formerly 2B), regulatory subunit B, beta isoform  |
| PRICKLE1 | 144165 | prickle homolog 1 (Drosophila)                                           |
| PRICKLE2 | 166336 | prickle homolog 2 (Drosophila)                                           |
| PRKACA   | 5566   | protein kinase, cAMP-dependent, catalytic, alpha                         |
| PRKACB   | 5567   | protein kinase, cAMP-dependent, catalytic, beta                          |
| PRKACG   | 5568   | protein kinase, cAMP-dependent, catalytic, gamma                         |
| PRKCA    | 5578   | protein kinase C, alpha                                                  |
| PRKCB1   | 5579   | protein kinase C, beta 1                                                 |
| PRKCD    | 5580   | protein kinase C, delta                                                  |
| PRKCE    | 5581   | protein kinase C, epsilon                                                |
| PRKCG    | 5582   | protein kinase C, gamma                                                  |
| PRKCH    | 5583   | protein kinase C, eta                                                    |
| PRKCI    | 5584   | protein kinase C, iota                                                   |
| PRKCQ    | 5588   | protein kinase C, theta                                                  |
| PRKCZ    | 5590   | Protein kinase C zeta                                                    |
| PRKD1    | 5587   | protein kinase D1                                                        |
| PRKX     | 5613   | protein kinase, X-linked                                                 |
| PRKY     | 5616   | protein kinase, Y-linked                                                 |
| PSEN1    | 5663   | presenilin 1                                                             |
| PTPRA    | 5786   | protein tyrosine phosphatase, receptor type, A                           |
| RAC1     | 5879   | MRNA, clone: PO2ST9                                                      |
| RAC2     | 5880   | ras-related C3 botulinum toxin substrate 2                               |
| RAC3     | 5881   | ras-related C3 botulinum toxin substrate 3                               |
| RBX1     | 9978   | ring-box 1                                                               |
| RHOA     | 387    | ras homolog gene family, member A                                        |
| ROCK1    | 6093   | Rho-associated, coiled-coil containing protein kinase 1                  |
| ROCK2    | 9475   | Rho-associated, coiled-coil containing protein kinase 2                  |
| ROR2     | 4920   | receptor tyrosine kinase-like orphan receptor 2                          |
| RUNX2    | 860    | runt-related transcription factor 2                                      |
| RUVBL1   | 8607   | RuvB-like 1 (E. coli)                                                    |
| SALL1    | 6299   | sal-like 1 (Drosophila)                                                  |
| SEN2     | 59343  | SUMO1/sentrin/SMT3 specific peptidase 2                                  |
| SFRP1    | 6422   | secreted frizzled-related protein 1                                      |

|         |       |                                                                               |
|---------|-------|-------------------------------------------------------------------------------|
| SFRP2   | 6423  | secreted frizzled-related protein 2                                           |
| SFRP4   | 6424  | secreted frizzled-related protein 4                                           |
| SFRP5   | 6425  | secreted frizzled-related protein 5                                           |
| SIAH1   | 6477  | seven in absentia homolog 1 (Drosophila)                                      |
| SKP1A   | 6500  | S-phase kinase-associated                                                     |
| SMAD2   | 4087  | SMAD family member 2                                                          |
| SMAD3   | 4088  | SMAD family member 3                                                          |
| SMAD4   | 4089  | CDNA FLJ59261 complete cds                                                    |
| SOX1    | 6656  | SRY (sex determining region Y)-box 1                                          |
| SOX17   | 64321 | SRY (sex determining region Y)-box 17                                         |
| TAX1BP3 | 30851 | Tax1 (human T-cell leukemia virus type I) binding protein 3                   |
| TBL1X   | 6907  | transducin (beta)-like 1X-linked                                              |
| TBL1XR1 | 79718 | transducin (beta)-like 1 X-linked receptor 1                                  |
| TBL1Y   | 90665 | transducin (beta)-like 1Y-linked                                              |
| TBP     | 6908  | TATA box binding protein                                                      |
| TCF1    | 6927  | transcription factor 1                                                        |
| TCF3    | 6929  | transcription factor 3 (E2A immunoglobulin enhancer binding factors E12/E47)  |
| TCF4    | 6925  | transcription factor 4                                                        |
| TCF7    | 6932  | transcription factor 7 (T-cell specific, HMG-box)                             |
| TCF7L1  | 83439 | transcription factor 7-like 1 (T-cell specific, HMG-box)                      |
| TCF7L2  | 6934  | transcription factor 7-like 2 (T-cell specific, HMG-box)                      |
| TFAP2A  | 7020  | transcription factor AP-2 alpha (activating enhancer binding protein 2 alpha) |
| TLE1    | 7088  | transducin-like enhancer of split 1 (E(sp1) homolog, Drosophila)              |
| TP53    | 7157  | tumor protein p53                                                             |
| TSHB    | 7252  | thyroid stimulating hormone, beta                                             |
| VANGL1  | 81839 | vang-like 1 (van gogh, Drosophila)                                            |
| VANGL2  | 57216 | vang-like 2 (van gogh, Drosophila)                                            |
| WIF1    | 11197 | WNT inhibitory factor 1                                                       |
| WNT1    | 7471  | wingless-type MMTV integration site family, member 1                          |
| WNT10A  | 80326 | wingless-type MMTV integration site family, member 10A                        |
| WNT10B  | 7480  | wingless-type MMTV integration site family, member 10B                        |
| WNT11   | 7481  | wingless-type MMTV integration site family, member 11                         |
| WNT16   | 51384 | wingless-type MMTV integration site family, member 16                         |
| WNT2    | 7472  | wingless-type MMTV integration site family member 2                           |
| WNT2B   | 7482  | wingless-type MMTV integration site family, member 2B                         |
| WNT3    | 7473  | wingless-type MMTV integration site family, member 3                          |
| WNT4    | 54361 | wingless-type MMTV integration site family, member 4                          |
| WNT5A   | 7474  | wingless-type MMTV integration site family, member 5A                         |
| WNT5B   | 81029 | wingless-type MMTV integration site family, member 5B                         |
| WNT6    | 7475  | wingless-type MMTV integration site family, member 6                          |
| WNT7A   | 7476  | wingless-type MMTV integration site family, member 7A                         |
| WNT7B   | 7477  | wingless-type MMTV integration site family, member 7B                         |

|       |      |                                                       |
|-------|------|-------------------------------------------------------|
| WNT8A | 7478 | wingless-type MMTV integration site family, member 8A |
| WNT8B | 7479 | wingless-type MMTV integration site family, member 8B |
| WNT9A | 7483 | wingless-type MMTV integration site family, member 9A |
| WNT9B | 7484 | wingless-type MMTV integration site family, member 9B |

**Supplementary Table 4:** Wnt-pathway miRNA list: 49 Wnt-related miRNAs from the literature

| Symbol     | Role in Wnt/ $\beta$ -Catenin Pathway                                                                                                                                                  | Supplementary References |
|------------|----------------------------------------------------------------------------------------------------------------------------------------------------------------------------------------|--------------------------|
| miR-let-7c | Downregulated after Wnt-signaling Activation in Lithium + MDI cells vs. MDI cells                                                                                                      | (3)                      |
| miR-9      | Regulates <i>CDH1</i> and activates Wnt-signaling                                                                                                                                      | (4)                      |
| miR-15/16  | Downregulated by active Wnt-Signaling                                                                                                                                                  | (5)                      |
| miR-17     | Downregulation inhibits <i>CDH1</i>                                                                                                                                                    | (6)                      |
| miR-18a    | Upregulated in Microarray after Wnt-signaling Activation of pre-adipocytes with Lithium                                                                                                | (3)                      |
| miR-21     | Targets <i>Wnt1</i>                                                                                                                                                                    | (7)                      |
| miR-23b    | Upregulated in Microarray after Wnt-signaling Activation in Lithium + MDI cells vs. MDI cells                                                                                          | (3)                      |
| miR-24-1   | Upregulated in Microarray after Wnt-signaling Activation of pre-adipocytes with Lithium; Upregulated in Microarray after Wnt-signaling Activation in Lithium + MDI cells vs. MDI cells | (3)                      |
| miR-27b    | Upregulated in Microarray after Wnt-signaling Activation in Lithium + MDI cells vs. MDI cells                                                                                          | (3)                      |
| miR-29a/c  | Modulates Wnt-signaling                                                                                                                                                                | (8)                      |
| miR-30a    | Downregulated after Wnt-signaling Activation in Lithium + MDI cells vs. MDI cells                                                                                                      | (3)                      |
| miR-30e    | Transactivated by $\beta$ -Catenin/TCF4                                                                                                                                                | (9)                      |
| miR-31     | Increases <i>Wnt5a</i>                                                                                                                                                                 | (10)                     |
| miR-106b   | Downregulation inhibits <i>CDH1</i>                                                                                                                                                    | (6)                      |
| miR-122a   | Targets Wnt-signaling                                                                                                                                                                  | (11)                     |
| miR-135a   | Activates Wnt-signaling through <i>APC</i>                                                                                                                                             | (12)                     |
| miR-135b   | Activates Wnt-signaling                                                                                                                                                                | (12)                     |
| miR-145    | Inhibits $\beta$ -Catenin through <i>MUC1</i>                                                                                                                                          | (13)                     |
| miR-146b   | Downregulated in Microarray after Wnt-signaling Activation of pre-adipocytes with Lithium                                                                                              | (3)                      |
| miR-148a   | Downregulated after Wnt-signaling Activation in Lithium + MDI cells vs. MDI cells                                                                                                      | (3)                      |
| miR-181a-1 | Upregulated in Microarray after Wnt-signaling Activation in Lithium + MDI cells vs. MDI cells                                                                                          | (3, 14)                  |

|          |                                                                                                                                                                                        |         |
|----------|----------------------------------------------------------------------------------------------------------------------------------------------------------------------------------------|---------|
| miR-181b | Upregulated in Microarray after Wnt-signaling Activation in Lithium + MDI cells vs. MDI cells                                                                                          | (3, 14) |
| miR-181d | Upregulated in Microarray after Wnt-signaling Activation in Lithium + MDI cells vs. MDI cells                                                                                          | (3, 14) |
| miR-183  | Upregulated in Microarray after Wnt-signaling Activation of pre-adipocytes with Lithium                                                                                                | (3)     |
| miR-186  | Upregulated in Microarray after Wnt-signaling Activation of pre-adipocytes with Lithium                                                                                                | (3)     |
| miR-194  | Downregulated after Wnt-signaling Activation in Lithium + MDI cells vs. MDI cells                                                                                                      | (3)     |
| miR-196a | Downregulated in Microarray after Wnt-signaling Activation of pre-adipocytes with Lithium                                                                                              | (3)     |
| miR-200a | Activates Wnt-signaling                                                                                                                                                                | (15)    |
| miR-200c | Activates Wnt-signaling                                                                                                                                                                | (15)    |
| miR-203  | Targets <i>Lef1</i>                                                                                                                                                                    | (16)    |
| miR-210  | Represses Wnt-Signaling                                                                                                                                                                | (3)     |
| miR-214  | Downregulated in Microarray after Wnt-signaling Activation of pre-adipocytes with Lithium                                                                                              | (3)     |
| miR-222  | Upregulated in Microarray after Wnt-signaling Activation in Lithium + MDI cells vs. MDI cells                                                                                          | (3)     |
| miR-301a | Upregulated in Microarray after Wnt-signaling Activation in Lithium + MDI cells vs. MDI cells                                                                                          | (3)     |
| miR-315  | Activates Wnt Signaling                                                                                                                                                                | (17)    |
| miR-320  | Upregulated in Microarray after Wnt-signaling Activation in Lithium + MDI cells vs. MDI cells                                                                                          | (3)     |
| miR-322  | Downregulated in Microarray after Wnt-signaling Activation of pre-adipocytes with Lithium; downregulated after Wnt-signaling Activation in Lithium + MDI cells vs. MDI cells           | (3)     |
| miR-335  | Downregulated after Wnt-signaling Activation in Lithium + MDI cells vs. MDI cells                                                                                                      | (3)     |
| miR-344  | Upregulated in Microarray after Wnt-signaling Activation of pre-adipocytes with Lithium; Upregulated in Microarray after Wnt-signaling Activation in Lithium + MDI cells vs. MDI cells | (3)     |
| miR-351  | Downregulated in Microarray after Wnt-signaling Activation of pre-adipocytes with Lithium                                                                                              | (3)     |
| miR-375  | Expression correlated to that of beta-catenin-targeted genes                                                                                                                           | (18)    |
| miR-449  | Targets WNT1-inducible signaling pathway protein 2 ( <i>WISP2</i> )                                                                                                                    | (19)    |
| miR-450a | Downregulated after Wnt-signaling Activation in Lithium + MDI cells vs. MDI cells                                                                                                      | (3)     |
| miR-468  | Downregulated after Wnt-signaling Activation in Lithium + MDI cells vs. MDI cells                                                                                                      | (3)     |

|            |                                                                                                                                                                                       |     |
|------------|---------------------------------------------------------------------------------------------------------------------------------------------------------------------------------------|-----|
| miR-503    | Downregulated in Microarray after Wnt-signaling<br>Activation of pre-adipocytes with Lithium                                                                                          | (3) |
| miR-542-5p | Downregulated in Microarray after Wnt-signaling<br>Activation of pre-adipocytes with Lithium;<br>Downregulated after Wnt-signaling Activation in<br>Lithium + MDI cells vs. MDI cells | (3) |
| miR-582-5p | Upregulated in Microarray after Wnt-signaling<br>Activation of pre-adipocytes with Lithium                                                                                            | (3) |
| miR-714    | Upregulated in Microarray after Wnt-signaling<br>Activation in Lithium + MDI cells vs. MDI cells                                                                                      | (3) |

**Supplementary Table 5:** Significantly differentially expressed Wnt-related genes in CTNNB1- and Wnt-TGF $\beta$ -class samples of the training set.

| Over-expressed in CTNNB1 |       |        | Under-expressed in CTNNB1 |        |        |
|--------------------------|-------|--------|---------------------------|--------|--------|
| Gene Symbol              | Score | FDR    | Gene Symbol               | Score  | FDR    |
| NKD1                     | 8.049 | <0.001 | CTBP2                     | -6.207 | <0.001 |
| AXIN2                    | 8.017 | <0.001 | WNT4                      | -5.930 | <0.001 |
| ROCK2                    | 7.771 | <0.001 | TCF7L1                    | -5.627 | <0.001 |
| SALL1                    | 7.200 | <0.001 | ARRB1                     | -4.983 | <0.001 |
| TLE1                     | 4.845 | <0.001 | MAP1B                     | -4.389 | <0.001 |
| DVL2                     | 4.758 | <0.001 | NFATC1                    | -3.980 | <0.001 |
| CTNNBIP1                 | 4.585 | <0.001 | PLAU                      | -3.912 | <0.001 |
| SMAD3                    | 4.551 | <0.001 | WNT2                      | -3.726 | <0.001 |
| TCF7                     | 4.483 | <0.001 | FSTL1                     | -3.689 | <0.001 |
| BRD7                     | 4.000 | <0.001 | CXXC4                     | -3.639 | <0.001 |
| DAAM1                    | 3.834 | <0.001 | CDH1                      | -3.467 | <0.001 |
| CUL1                     | 3.585 | <0.001 | FZD1                      | -3.379 | 0.017  |
| PPP3CB                   | 3.406 | 0.023  | PRKCD                     | -3.167 | 0.023  |
| DLG1                     | 2.842 | 0.042  | PLCB2                     | -3.150 | 0.017  |
| RUVBL1                   | 2.830 | 0.028  | CSNK1E                    | -3.037 | 0.023  |
| TBL1XR1                  | 2.826 | 0.033  | PRKCB1                    | -3.027 | 0.028  |
| SENP2                    | 2.801 | 0.042  | NKD2                      | -2.776 | 0.023  |
|                          |       |        | WNT10A                    | -2.623 | 0.042  |
|                          |       |        | FZD10                     | -2.326 | 0.033  |

  

| Over-expressed in Wnt-TGF $\beta$ |       |        | Under-expressed in Wnt-TGF $\beta$ |        |        |
|-----------------------------------|-------|--------|------------------------------------|--------|--------|
| Gene Symbol                       | Score | FDR    | Gene Symbol                        | Score  | FDR    |
| DAB2                              | 6.464 | <0.001 | TCF1                               | -6.600 | <0.001 |
| PLAU                              | 5.983 | <0.001 | LRP6                               | -5.191 | <0.001 |
| TAX1BP3                           | 5.912 | <0.001 | LRP1                               | -4.182 | <0.001 |
| RUNX2                             | 5.826 | <0.001 | PRKCE                              | -4.053 | <0.001 |
| RAC2                              | 5.785 | <0.001 | WNT16                              | -4.015 | <0.001 |
| FZD2                              | 4.525 | <0.001 | FZD4                               | -4.010 | <0.001 |
| PRKCD                             | 4.353 | <0.001 | SALL1                              | -3.794 | <0.001 |
| MMP7                              | 4.304 | <0.001 | WNT1                               | -3.678 | <0.001 |
| PRKX                              | 4.241 | <0.001 | CAMK2A                             | -3.550 | 0.009  |
| FZD7                              | 4.060 | <0.001 | NR5A1                              | -3.483 | 0.019  |
| FRAT2                             | 3.732 | <0.001 | WNT8B                              | -3.448 | 0.019  |
| CDC2                              | 3.701 | <0.001 | CREBBP                             | -3.314 | 0.009  |
| HDAC1                             | 3.576 | <0.001 | DVL1                               | -2.979 | 0.019  |
| CACYBP                            | 3.531 | 0.009  | SOX1                               | -2.923 | 0.016  |
| FZD6                              | 3.518 | 0.016  | PRKCA                              | -2.899 | 0.019  |
| DKK2                              | 3.214 | 0.000  | TSHB                               | -2.837 | 0.035  |
| MVP                               | 3.051 | 0.016  | WNT10B                             | -2.824 | 0.029  |
| PRKCI                             | 2.645 | 0.037  | NFATC3                             | -2.783 | 0.016  |
| MAP1B                             | 2.463 | 0.019  | NFATC2                             | -2.775 | 0.037  |
| SFRP4                             | 2.403 | 0.019  | CDX1                               | -2.705 | 0.037  |
| TCF4                              | 2.363 | 0.029  | PRKACG                             | -2.336 | 0.048  |
| ARRB2                             | 2.292 | 0.048  |                                    |        |        |
| CCND3                             | 2.180 | 0.037  |                                    |        |        |

|       |       |       |
|-------|-------|-------|
| PLCB4 | 2.109 | 0.019 |
| DKK3  | 1.993 | 0.048 |
| ROR2  | 1.914 | 0.029 |
| AKT3  | 1.880 | 0.048 |



**Supplementary Table 6:** Summary of dysregulated CTNNB1- and Wnt-TGF $\beta$ -Wnt-genes according to their cellular localization and their known or suspected function

|           |              | CTNNB1              |                                                      | Wnt-TGF $\beta$                       |                                                              |
|-----------|--------------|---------------------|------------------------------------------------------|---------------------------------------|--------------------------------------------------------------|
|           |              | pathway activation  | pathway inhibition                                   | pathway activation                    | pathway inhibition                                           |
| Membrane  | activators   |                     | FZD10 ↓<br>FZD1 ↓<br>WNT2 ↓<br>WNT4 ↓<br>WNT10A ↓    | FZD2 ↑<br>FZD7 ↑<br>FZD6 ↑            | FZD4 ↓<br>WNT1 ↓<br>WNT8B ↓<br>WNT10B ↓<br>WNT16 ↓<br>LRP6 ↓ |
|           | inhibitors   | CDH1 ↓              |                                                      | LRP1 ↓                                | SFRP4 ↑<br>DKK2 ↑<br>DKK3 ↑                                  |
| Cytoplasm | activators   | BRD7 ↑<br>DVL2 ↑    | FSTL1 ↓<br>CSNK1E ↓                                  | FRAT2 ↑<br>ARRB2 ↑<br>AKT3 ↑          |                                                              |
|           | inhibitors   | ARRB1 ↓<br>CXXC4 ↓  | AXIN2 ↑<br>DLG1 ↑<br>PPP3CB ↑<br>CUL1 ↑<br>TBL1XR1 ↑ | DVL1 ↓                                | CACYBP ↑<br>DAB2 ↑                                           |
| Nucleus   | activators   | SMAD3 ↑<br>RUVBL1 ↑ | TCF7L1 ↓<br>FSTL1 ↓                                  | HDAC1 ↑<br>TCF4 ↑                     | TCF1 ↓                                                       |
|           | inhibitors   | CTBP2 ↓             | SALL1 ↑<br>TLE1 ↑<br>CTNNBIP1 ↑<br>TCF7 ↑<br>SENP2 ↑ | SALL1 ↓<br>SOX1 ↓<br>CDX1 ↓           | TAX1BP3 ↑                                                    |
|           | target genes | ---                 | PLAU ↓                                               | PLAU ↑<br>RUNX2 ↑<br>MMP7 ↑<br>CDC2 ↑ | ---                                                          |

|                                          |                   |                    |                     |                                             |
|------------------------------------------|-------------------|--------------------|---------------------|---------------------------------------------|
|                                          |                   |                    |                     | CCND3 ↑                                     |
| <b>Non-Canonical<br/>Ca<sup>2+</sup></b> | <b>activators</b> | --                 | PLCB2 ↓<br>NFATC1 ↓ | PLCB4 ↑<br>CAMK2A ↓<br>NFATC2 ↓<br>NFATC3 ↓ |
| <b>Non-Canonical<br/>PCP</b>             | <b>activators</b> | DAAM1 ↑<br>ROCK2 ↑ | MAP1B ↓             | MAP1B ↑<br>ROR2 ↑<br>RAC2 ↑<br>---          |
|                                          |                   |                    | ↑ over-expression   | ↓ down-regulation                           |

**Supplementary Table 7:** Expression of known liver-related Wnt-target-genes.

| <b>Training Set</b> |                            |        |                 |        |                          |       |
|---------------------|----------------------------|--------|-----------------|--------|--------------------------|-------|
| Gene Symbol         | CTNNB1 vs. Wnt-TGF $\beta$ |        | CTNNB1 vs. Rest |        | Wnt-TGF $\beta$ vs. Rest |       |
|                     | Score                      | FDR    | Score           | FDR    | Score                    | FDR   |
| MERTK               | 5.922                      | <0.001 | 5.661           | <0.001 | -3.770                   | 0.018 |
| GLUL                | 5.715                      | <0.001 | 6.570           | <0.001 | -2.111                   | 0.180 |
| SPARCL1             | 4.602                      | <0.001 | 5.688           | <0.001 | -1.861                   | 0.180 |
| EPHB2               | 4.075                      | <0.001 | 4.460           | <0.001 | -2.091                   | 0.241 |
| LGR5                | 4.045                      | <0.001 | 5.099           | <0.001 | -1.318                   | 0.303 |
| TBX3                | 3.903                      | 0.005  | 4.316           | <0.001 | -2.079                   | 0.180 |
| REG3A               | 2.935                      | 0.005  | 3.696           | <0.001 | -0.790                   | 0.430 |
| LEF1                | 0.060                      | 0.944  | 1.014           | 0.244  | 0.763                    | 0.430 |
| LAMA1               | -1.325                     | 0.196  | -2.224          | 0.036  | 0.977                    | 0.427 |

  

| <b>Validation Set</b> |                            |        |                 |        |                          |        |
|-----------------------|----------------------------|--------|-----------------|--------|--------------------------|--------|
| Gene Symbol           | CTNNB1 vs. Wnt-TGF $\beta$ |        | CTNNB1 vs. Rest |        | Wnt-TGF $\beta$ vs. Rest |        |
|                       | Score                      | FDR    | Score           | FDR    | Score                    | FDR    |
| GLUL                  | 18.765                     | <0.001 | 22.324          | <0.001 | -2.470                   | 0.036  |
| TBX3                  | 16.299                     | <0.001 | 18.880          | <0.001 | -4.479                   | <0.001 |
| LGR5                  | 13.059                     | <0.001 | 13.268          | <0.001 | -5.017                   | <0.001 |
| MERTK                 | 7.758                      | <0.001 | 10.827          | <0.001 | 5.323                    | <0.001 |
| SPARCL1               | 6.594                      | <0.001 | 8.648           | <0.001 | -0.750                   | 0.468  |
| REG3A                 | 5.097                      | <0.001 | 6.674           | <0.001 | 0.445                    | 0.702  |
| EPHB2                 | 5.098                      | <0.001 | 5.793           | <0.001 | -1.954                   | 0.108  |
| LEF1                  | -0.804                     | 0.446  | 3.302           | 0.007  | -0.947                   | 0.468  |
| LAMA1                 | -1.019                     | 0.335  | -2.421          | 0.03   | -0.881                   | 0.468  |

Supplementary Table 8: Correlation of Wnt-related transcription factors to Wnt-target-genes in the training set.

|                                 | CTNNB1 target genes |                 |                 |                 |                 |                |                 |                 |                 |                 | Wnt-TGFβ target genes |                 |  |  |
|---------------------------------|---------------------|-----------------|-----------------|-----------------|-----------------|----------------|-----------------|-----------------|-----------------|-----------------|-----------------------|-----------------|--|--|
|                                 | REG3A               | LGR5            | MERTK           | TBX3            | EPHB2           | SPARCL1        | GLUL            | RUNX3           | CDC2            | MMP7            | CCND3                 | PLAU            |  |  |
| <b>CTNNB1 nuclear factors</b>   |                     |                 |                 |                 |                 |                |                 |                 |                 |                 |                       |                 |  |  |
| SMAD3                           | 0.003<br>.258       | <0.001<br>.557  | <0.001<br>.388  | <0.001<br>.354  | <0.001<br>.456  | <0.001<br>.332 | <0.001<br>.570  | n.s.            | n.s.            | 0.022<br>-.200  | n.s.                  | n.s.            |  |  |
| RUVBL1                          | 0.031<br>.188       | <0.001<br>.416  | 0.014<br>.213   | <0.001<br>.304  | n.s.            | 0.003<br>.259  | <0.001<br>.496  | 0.001<br>-.279  | <0.001<br>.577  | n.s.            | <0.001<br>-.414       | n.s.            |  |  |
| TCF7L1                          | 0.001<br>-.278      | <0.001<br>-.369 | 0.023<br>-.197  | 0.002<br>-.268  | <0.001<br>-.313 | n.s.           | <0.001<br>-.314 | n.s.            | n.s.            | n.s.            | n.s.                  | n.s.            |  |  |
| FSTL1                           | 0.007<br>-.235      | 0.001<br>-.296  | 0.030<br>-.189  | <0.001<br>-.390 | <0.001<br>-.306 | n.s.           | <0.001<br>-.374 | <0.001<br>.353  | n.s.            | <0.001<br>.563  | <0.001<br>.307        | <0.001<br>.400  |  |  |
| CTBP2                           | 0.045<br>-.175      | <0.001<br>-.401 | <0.001<br>-.348 | <0.001<br>-.337 | n.s.            | 0.002<br>-.266 | <0.001<br>-.374 | 0.006<br>.239   | <0.001<br>-.306 | 0.002<br>.268   | 0.001<br>.281         | n.s.            |  |  |
| SENP2                           | n.s.                | 0.046<br>.174   | 0.005<br>.242   | 0.001<br>.292   | n.s.            | n.s.           | 0.014<br>.212   | 0.009<br>-.226  | 0.001<br>.305   | n.s.            | <0.001<br>-.364       | 0.018<br>.205   |  |  |
| TLE1                            | 0.001<br>.291       | <0.001<br>.396  | <0.001<br>.393  | <0.001<br>.375  | 0.003<br>.260   | 0.001<br>.283  | <0.001<br>.514  | 0.003<br>-.259  | 0.002<br>.263   | <0.001<br>.477  | 0.021<br>-.200        | <0.001<br>-.354 |  |  |
| CTNNBIP1                        | n.s.                | 0.004<br>.250   | <0.001<br>.362  | <0.001<br>.391  | <0.001<br>.387  | 0.015<br>.211  | <0.001<br>.353  | <0.001<br>-.345 | n.s.            | <0.001<br>-.376 | 0.001<br>-.299        | <0.001<br>-.306 |  |  |
| TCF7                            | <0.001<br>.339      | <0.001<br>.490  | <0.001<br>.356  | <0.001<br>.427  | <0.001<br>.521  | <0.001<br>.344 | <0.001<br>.518  | n.s.            | n.s.            | n.s.            | n.s.                  | n.s.            |  |  |
| SALL1                           | n.s.                | <0.001<br>.392  | <0.001<br>.536  | <0.001<br>.414  | 0.017<br>.208   | <0.001<br>.299 | <0.001<br>.374  | 0.006<br>-.237  | n.s.            | 0.004<br>-.248  | n.s.                  | <0.001<br>-.391 |  |  |
| <b>Wnt-TGFβ nuclear factors</b> |                     |                 |                 |                 |                 |                |                 |                 |                 |                 |                       |                 |  |  |
| TCF1                            | n.s.                | n.s.            | 0.040<br>.179   | <0.001<br>.350  | 0.002<br>.268   | n.s.           | 0.001<br>.281   | 0.001<br>-.279  | n.s.            | <0.001<br>-.507 | 0.019<br>-.204        | <0.001<br>-.529 |  |  |
| HDAC1                           | n.s.                | n.s.            | 0.003<br>-.257  | n.s.            | 0.007<br>-.234  | n.s.           | n.s.            | 0.045<br>.175   | <0.001<br>.559  | n.s.            | n.s.                  | 0.004<br>.252   |  |  |
| CDX1                            | n.s.                | n.s.            | n.s.            | n.s.            | 0.001<br>.283   | 0.013<br>-.216 | n.s.            | 0.006<br>-.289  | <0.001<br>-.321 | 0.029<br>-.190  | 0.027<br>-.193        | 0.026<br>-.194  |  |  |
| SOX1                            | n.s.                | n.s.            | n.s.            | n.s.            | <0.001<br>.308  | n.s.           | n.s.            | <0.001<br>-.312 | 0.017<br>-.208  | n.s.            | 0.020<br>-.202        | n.s.            |  |  |
| TAXIPB3                         | n.s.                | n.s.            | n.s.            | n.s.            | n.s.            | 0.007<br>.234  | n.s.            | n.s.            | 0.003<br>.253   | <0.001<br>.371  | n.s.                  | <0.001<br>.503  |  |  |
| TCF4                            | n.s.                | n.s.            | n.s.            | 0.001<br>-.362  | n.s.            | n.s.           | 0.004<br>-.246  | <0.001<br>.389  | n.s.            | 0.004<br>.251   | <0.001<br>.335        | n.s.            |  |  |

Numbers shown are p-values and Spearman coefficients (grey shading if correlation is significant and in the right direction)

**Supplementary Table 9.** Frequency of  $\beta$ -catenin IHC positive samples and CTNNB1 mutations Wnt-related and non-Wnt-related subclasses of HCC in the in training (T) and validation (V) sets.

|                                                     | CTNNB1 class |       | Wnt-TGF $\beta$ class |       | non-Wnt |       |
|-----------------------------------------------------|--------------|-------|-----------------------|-------|---------|-------|
|                                                     | T            | V     | T                     | V     | T       | V     |
| <b><math>\beta</math>-catenin IHC nucl and cyto</b> | 63.6%        | 82.4% | 20.0%                 | 16.0% | 29.5%   | 17.3% |
|                                                     | 14/22        | 28/34 | 4/20                  | 5/32  | 13/44   | 13/75 |
| <b>CTNNB1 mutations</b>                             | 62.5%        | n.d.  | 9.5%                  | n.d.  | 26.6%   | n.d.  |
| (T: Sanger Seq, V: Mutation signature)              | 15/24        |       | 2/21                  |       | 12/45   |       |

\* Ratios correspond to positive samples/total number of samples with available data (see Fig. 2 and Suppl Fig. 1)  
n.d.: not determined

**Supplementary Table 10:** Differentially expressed Wnt-related-miRNAs in 89 HCC samples of the training set.

|                        | Wnt-TGF $\beta$ vs. CTNNB1 |        | Wnt-TGF $\beta$ vs. Rest |        | CTNNB1 vs. Rest    |        |
|------------------------|----------------------------|--------|--------------------------|--------|--------------------|--------|
|                        | Score*                     | FDR    | Score*                   | FDR    | Score <sup>^</sup> | FDR    |
| hmr-miR-181b_rfam7.0   | 4.976                      | 0.003  | 2.82                     | <0.001 | -4.739             | <0.001 |
| hmr-miR-181a_rfam7.0   | 4.599                      | 0.003  | 1.809                    | 0.197  | -5.073             | <0.001 |
| h-miR-181d_rfam7.0     | 4.29                       | 0.003  | 2.658                    | 0.034  | -3.156             | 0.023  |
| hmr-miR-214_rfam7.0    | 4.014                      | 0.006  | 1.361                    | 0.349  | -5.51              | <0.001 |
| hmr-miR-203_rfam7.0    | 3.262                      | 0.003  | 1.466                    | 0.218  | -3.234             | 0.009  |
| hmr-miR-145_rfam7.0    | 2.496                      | 0.023  | 1.906                    | 0.166  | -1.24              | 0.234  |
| hmr-miR-183_rfam7.0    | 2.475                      | 0.028  | -0.414                   | 0.899  | -3.548             | 0.026  |
| hmr-miR-18a_rfam7.0    | 2.422                      | 0.015  | 2.003                    | 0.068  | -0.593             | 0.742  |
| h-miR-503_rfam7.0      | 2.419                      | 0.039  | 0.058                    | 0.97   | -2.439             | 0.047  |
| hm-miR-375_rfam7.0     | 2.11                       | 0.012  | 1.402                    | 0.214  | -2.744             | 0.048  |
| hm-miR-9*_rfam7.0      | 1.753                      | 0.056  | 1.903                    | <0.001 | 1.521              | 0.112  |
| hmr-miR-210_rfam7.0    | 1.234                      | 0.279  | 1.507                    | 0.218  | -0.057             | 0.97   |
| hmr-miR-196a_rfam7.0   | 1.08                       | 0.347  | 1.027                    | 0.363  | -0.485             | 0.742  |
| hmr-miR-320_rfam7.0    | 0.34                       | 0.69   | -0.413                   | 0.899  | -0.917             | 0.523  |
| hmr-miR-222_rfam7.0    | -0.084                     | 0.912  | 0.5                      | 0.789  | 0.54               | 0.617  |
| h-miR-146b_rfam7.0     | -0.995                     | 0.397  | -0.093                   | 0.97   | 1.016              | 0.367  |
| hmr-miR-24_rfam7.0     | -1.134                     | 0.306  | 0.613                    | 0.789  | 2.183              | 0.049  |
| hmr-miR-186_rfam7.0    | -1.817                     | 0.121  | 0.194                    | 0.899  | 2.563              | 0.029  |
| hmr-miR-16_rfam7.0     | -2.002                     | 0.067  | -0.256                   | 0.899  | 2.087              | 0.062  |
| hmr-miR-135a_rfam7.0   | -2.069                     | 0.023  | -0.06                    | 0.97   | 2.067              | 0.009  |
| hmr-miR-27b_rfam7.0    | -2.704                     | 0.012  | -1.009                   | 0.544  | 1.918              | 0.087  |
| hmr-miR-335_rfam7.0    | -2.728                     | 0.02   | -3.013                   | 0.034  | 0.287              | 0.754  |
| hm-miR-15a_rfam7.0     | -2.731                     | 0.02   | -0.286                   | 0.899  | 2.895              | 0.012  |
| hmr-let-7c_rfam7.0     | -2.77                      | 0.025  | -1.317                   | 0.363  | 2.099              | 0.062  |
| hmr-miR-23b_rfam7.0    | -2.799                     | 0.015  | -0.291                   | 0.899  | 3.074              | 0.009  |
| hmr-miR-29c_rfam7.0    | -2.808                     | 0.028  | -0.319                   | 0.899  | 3.191              | 0.012  |
| hmr-miR-29a_rfam7.0    | -3.093                     | 0.012  | -0.462                   | 0.899  | 3.056              | 0.009  |
| hmr-miR-30a-5p_rfam7.0 | -3.54                      | <0.001 | -1.077                   | 0.544  | 2.878              | 0.012  |
| hmr-miR-122a_rfam7.0   | -3.614                     | 0.006  | -2.153                   | 0.198  | 2.227              | 0.047  |
| hmr-miR-106b_rfam7.0   | -3.715                     | 0.006  | -2.025                   | 0.198  | 2.113              | 0.062  |
| hmr-miR-30e-5p_rfam7.0 | -4.035                     | 0.003  | -2.577                   | 0.128  | 2.288              | 0.043  |
| hmr-miR-194_rfam7.0    | -4.27                      | 0.003  | -2.737                   | 0.068  | 2.369              | 0.041  |
| hm-miR-148a_rfam7.0    | -7.3                       | 0.003  | -3.052                   | 0.041  | 5.551              | <0.001 |

\* positive value: up in Wnt-TGF $\beta$ ; negative value: down in Wnt-TGF $\beta$

<sup>^</sup> positive value: up in CTNNB1; negative value: down in CTNNB1

**Supplementary Table 11:** Enrichment of samples identified by CTNNB1-, Wnt-TGF $\beta$ -WntGenes- and CTNNB1-mutation-signature in CTNNB1 and Wnt-TGF $\beta$  subclasses in 5 independent datasets (Fisher's Exact Test).

|         |                 | CTNNB1-<br>WntGenes<br>signature | Wnt-TGF $\beta$ -<br>WntGenes<br>signature | CTNNB1-<br>mutation-<br>signature |
|---------|-----------------|----------------------------------|--------------------------------------------|-----------------------------------|
| HCC-I   | CTNNB1          | 0.001                            | n.s.                                       | <0.001                            |
|         | Wnt-TGF $\beta$ | n.s.                             | <0.001                                     | n.s.                              |
| HCC-II  | CTNNB1          | 0.001                            | n.s.                                       | <0.001                            |
|         | Wnt-TGF $\beta$ | n.s.                             | <0.001                                     | n.s.                              |
| HCC-III | CTNNB1          | n/a                              | n.s.                                       | <0.001                            |
|         | Wnt-TGF $\beta$ | n.s.                             | <0.001                                     | n.s.                              |
| HCC-IV  | CTNNB1          | <0.001                           | n.s.                                       | <0.001                            |
|         | Wnt-TGF $\beta$ | n.s.                             | <0.001                                     | n.s.                              |
| HCC-V   | CTNNB1          | <0.001                           | n.s.                                       | <0.001                            |
|         | Wnt-TGF $\beta$ | n.s.                             | <0.001                                     | n.s.                              |

\*Prediction of CTNNB1 and Wnt-TGF $\beta$  subclasses as previously published in main manuscript reference<sup>18</sup>.

**Supplementary Table 12:** 21 Liver Cancer cell lines analyzed by GSEA for gene expression profiles similar to either CTNNB1 or Wnt-TGF $\beta$  class.

| Cell Line | Histology           | HBV/HCV |
|-----------|---------------------|---------|
| C3A       | derivative of HepG2 | neg.    |
| HEP3B212  | HCC                 | HBV     |
| HepG2     | hepatoblastoma      | neg.    |
| HLE       | HCC                 | neg.    |
| HLF       | HCC                 | neg.    |
| Huh1      | HCC                 | HBV     |
| Huh7      | HCC                 | HCV     |
| JHH1      | HCC                 | neg.    |
| JHH2      | HCC                 | neg.    |
| JHH4      | HCC                 | neg.    |
| JHH5      | HCC                 | neg.    |
| JHH7      | HCC                 | HBV     |
| PLCPRF5   | HCC                 | HBV     |
| SKHEP1    | Adenocarcinoma      | neg.    |
| SNU182    | HCC                 | HBV     |
| SNU387    | HCC                 | HBV     |
| SNU398    | HCC                 | HBV     |
| SNU423    | HCC                 | HBV     |
| SNU449    | HCC                 | HBV     |
| SNU475    | HCC                 | HBV     |
| SNU878    | HCC                 | HBV     |



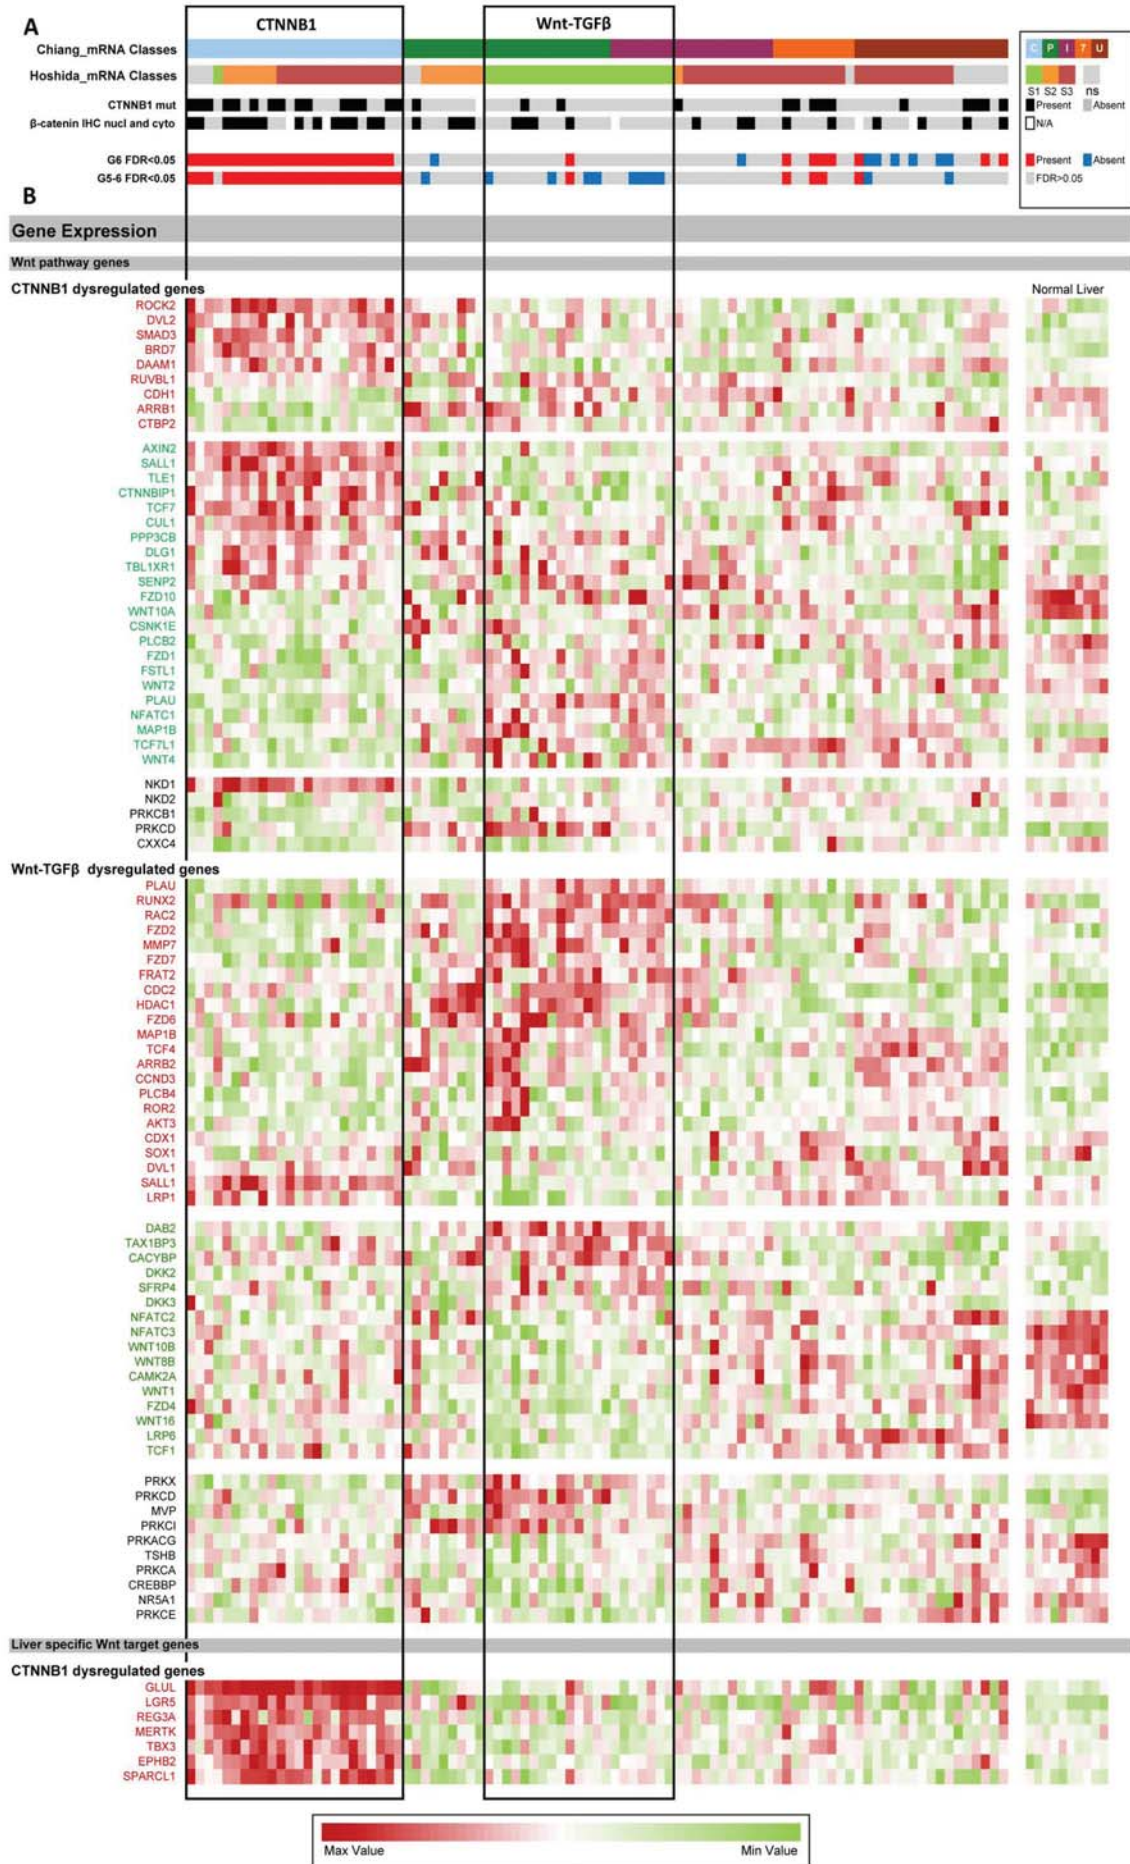

Supplementary Figure 2

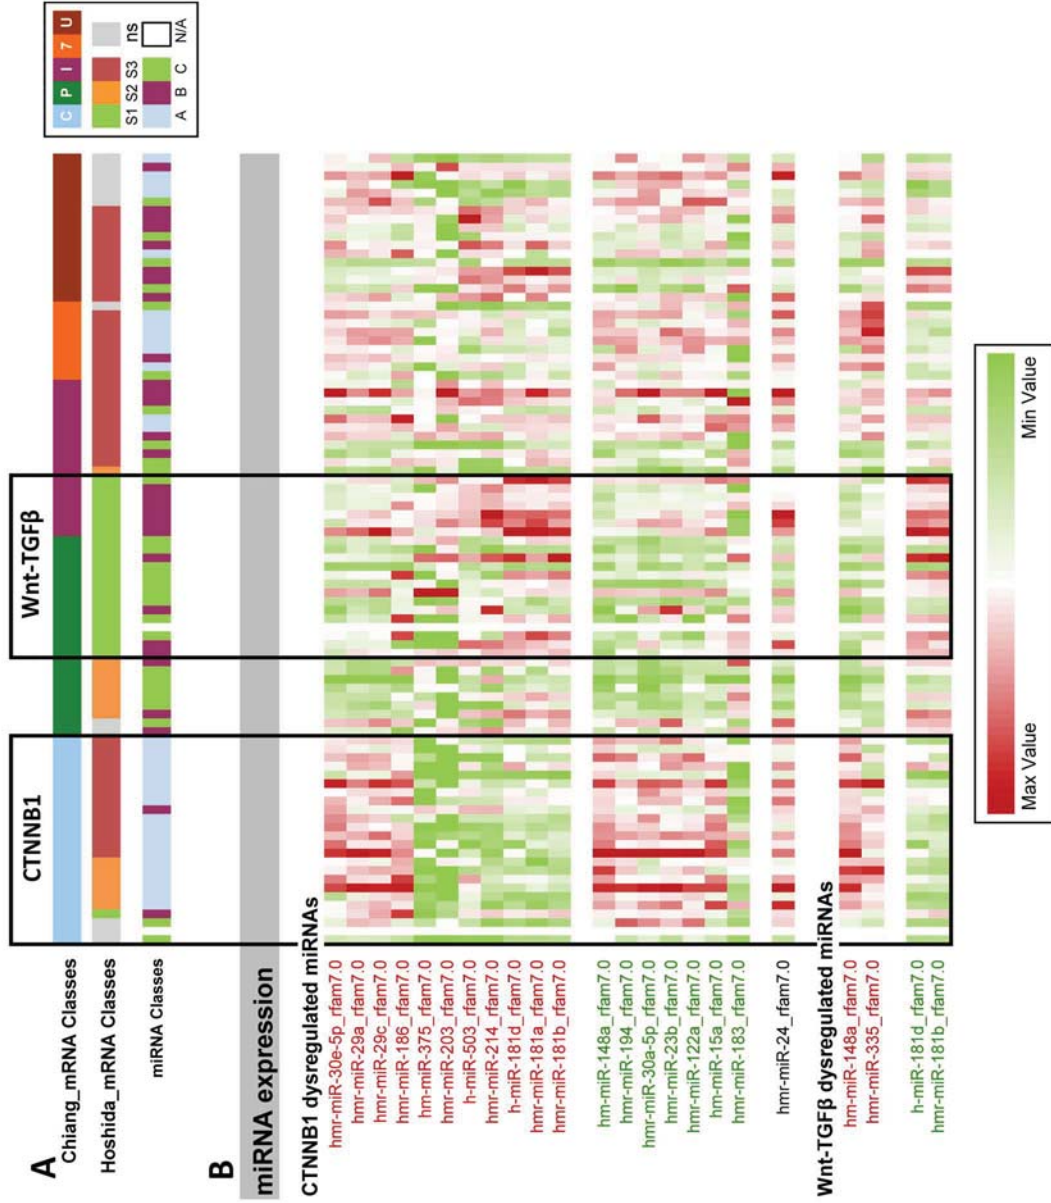

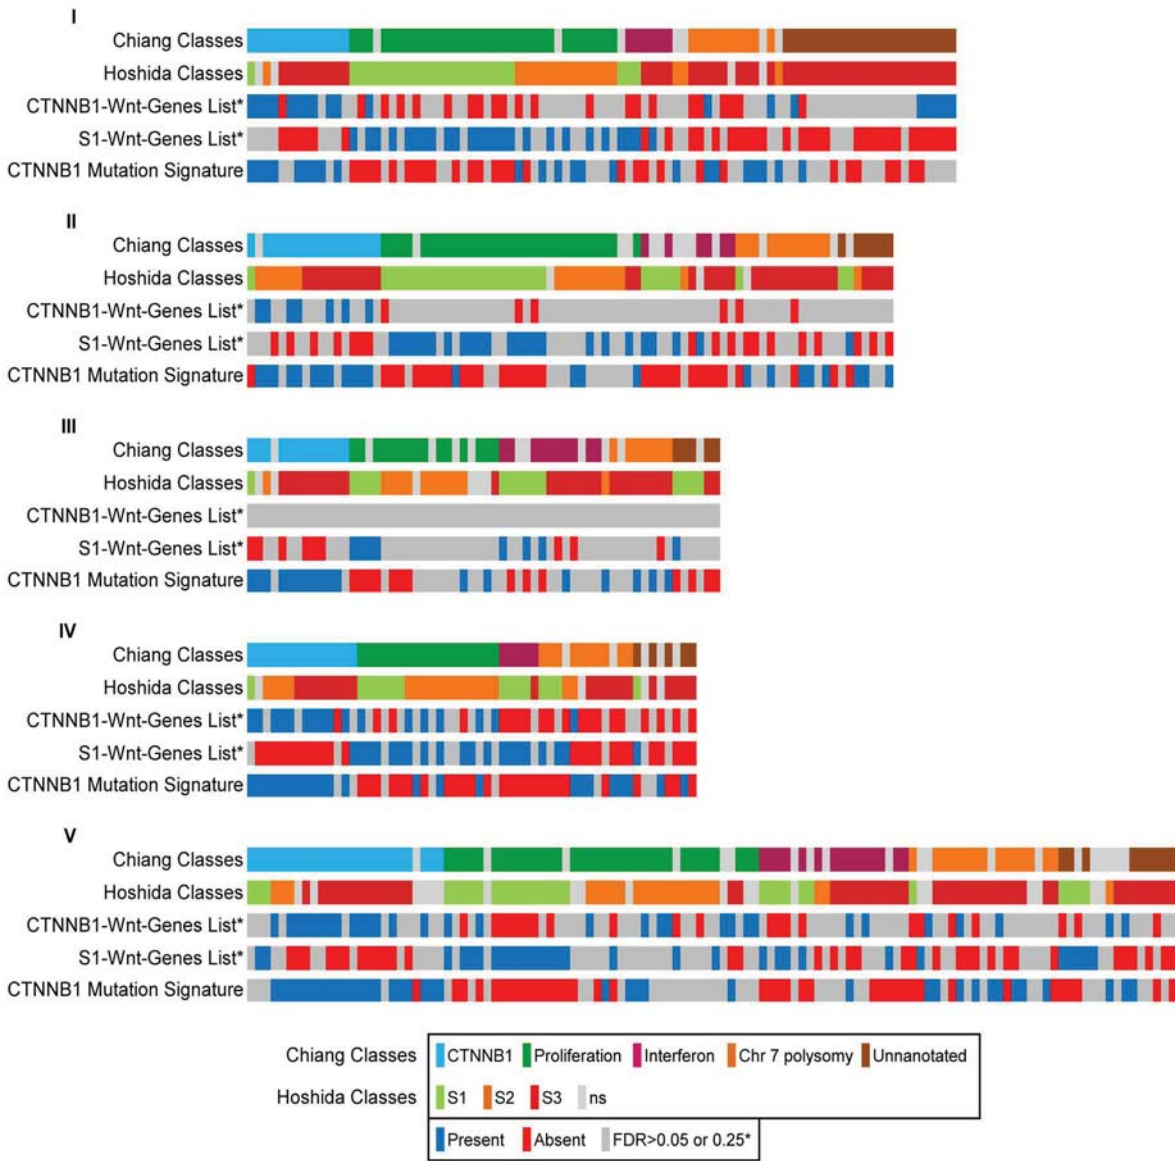

Supplementary Figure 4

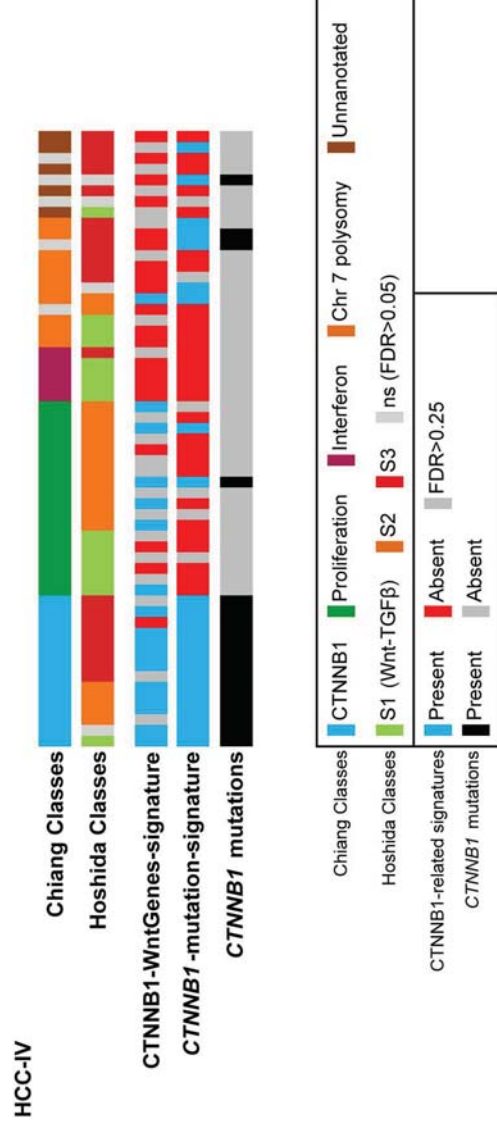

Supplementary Figure 5

29

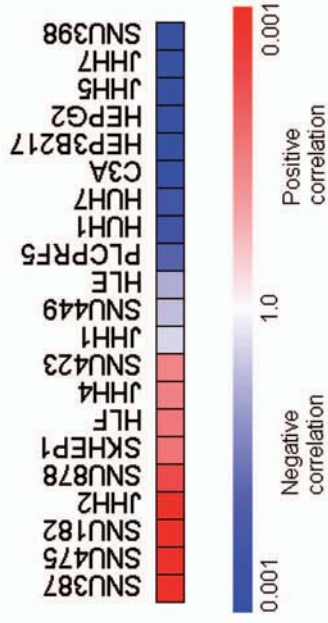

Hoshida's S1 signature enrichment p-value

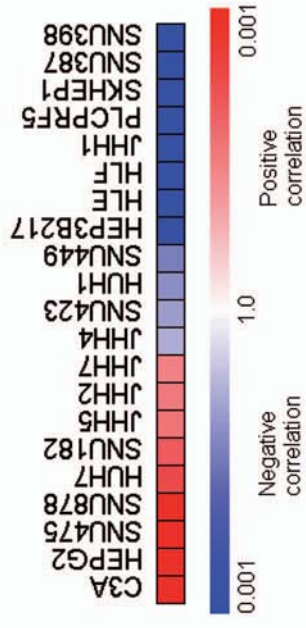

Chiang's CTNNB1 signature enrichment p-value

Supplementary Figure 6

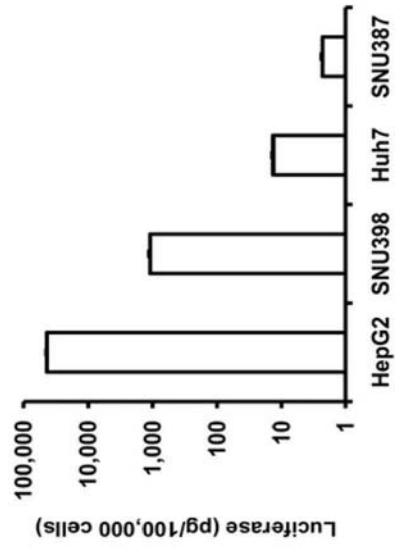

## Supplementary Figure 7

31

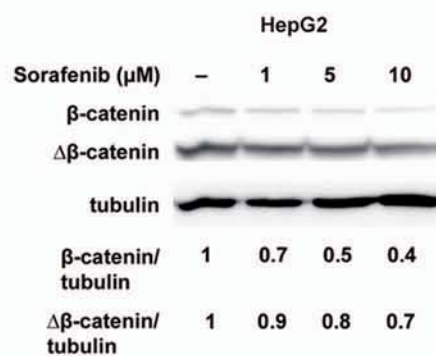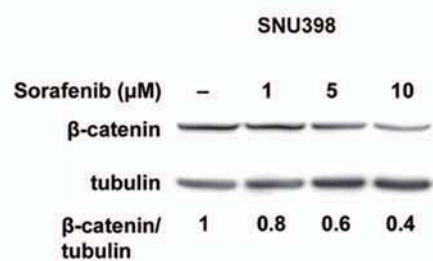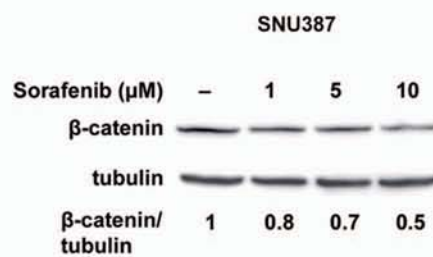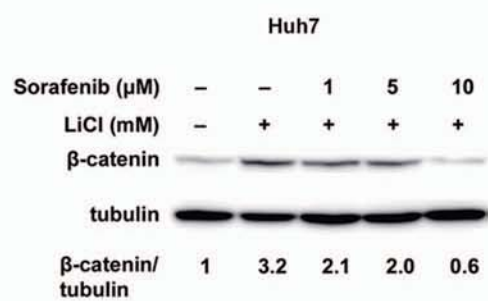

## Supplementary Figure Legends

### **Supplementary Figure 1: Differential Expression of Wnt-pathway mRNAs in the CTNNB1-**

**and Wnt-TGF $\beta$ -classes in the training set** (A) Molecular classification, *CTNNB1*-mutation, and *CTNNB1*-immunohistochemistry (IHC) as reported by Chiang (1); prediction of Hoshida's (15) and Boyault's (16) molecular classes. (B) Heat map representing significantly (FDR<0.05) dysregulated Wnt-pathway-genes and liver-related Wnt-target-genes in *CTNNB1*- and Wnt-TGF $\beta$ -class compared to the remaining HCCs and normal livers. Gene names highlighted in red and green are related to Wnt-pathway activation and inhibition, respectively. Function of genes in black is unclear.

### **Supplementary Figure 2: Differential Expression of Wnt-pathway-miRNAs in the CTNNB1-**

**and Wnt-TGF $\beta$ -classes in the training set** (A) Molecular classification, as reported by Chiang (1), prediction of Hoshida's (15) molecular classes, and annotation of Toffanin's miRNA classes (17). (B) Heat map with differential expression of Wnt-related-miRNAs in *CTNNB1*- and Wnt-TGF $\beta$ -class compared to the remaining HCCs. MiRNAs highlighted in red and green are related to Wnt-pathway activation and inhibition, respectively. MiRNAs in black have no clear function reported.

### **Supplementary Figure 3: Validation of *CTNNB1*- and Wnt-TGF $\beta$ -specific Wnt-related mRNA profiles and mutation-status in 5 public HCC datasets**

*CTNNB1*-WntGenes-signature was significantly enriched in *CTNNB1*-class of datasets I, II, IV and V, while Wnt-TGF $\beta$ -WntGenes-signature was significantly enriched in Wnt-TGF $\beta$ -class of all datasets. Samples called by *CTNNB1*-mutation-signature were significantly correlated to *CTNNB1*-class in all datasets. All displayed cohorts are publicly available gene expression HCC datasets (Suppl. Table 1), Chiang's and Hoshida's class prediction as previously published(15).



**Supplementary Figure 4: Validation of the mutation signature in an independent cohort of HCC.** A high overlap is observed between samples from HCC IV dataset captured by the CTNNB1-mutation-signature and samples known to be mutated for  $\beta$ -catenin. The displayed cohort is a publicly available gene expression HCC datasets (Suppl. Table 1) with CTNNB1 mutation annotation, Chiang's and Hoshida's class prediction as previously published(15).

**Supplementary Figure 5: Correlation of gene expression data from 21 different liver cancer cell lines with CTNNB1 and Wnt-TGF $\beta$  class signatures by GSEA** (A) Chiang's CTNNB1-signature is significantly enriched in HepG2 cells, but not in SNU 387 and SNU389 cells. (B) Hoshida's Wnt-TGF $\beta$ -signature is significantly enriched in SNU387 cells, but not in SNU389, HepG2 and Huh7.

**Supplementary Figure 6: Baseline luciferase levels in Wnt reporter liver cancer cells stably transduced with TCF/LEF luciferase reporter** Mean inferred luciferase pg values of two independent experiments and standard error bars are represented (logarithmic scale in y-axis).

**Supplementary Figure 7: Sorafenib decreases  $\beta$ -catenin protein levels in 4 liver cancer cell lines** Decrease of total  $\beta$ -catenin protein levels in non-reporter HepG2, SNU398, SNU387, and LiCl-stimulated Huh7 cells.

## **Supplementary Methods**

### ***Immunocytofluorescence***

Ice-cold methanol was used to fix (15 minutes) cells grown on poly-l-lysine coverslips (BD BioCoat, 354085). Cells were washed with PBS, permeabilized with 0.1% Triton X-100 in PBS for 5 minutes and blocking was performed in PBS-5%BSA for 1 hour at room temperature. Anti- $\beta$ -catenin antibody (BD Transduction Laboratories) was diluted 1:500 in blocking solution, and added to cells for 1 hour at room temperature. Following PBS washes, goat anti-mouse Alexa Fluor-594 conjugated IgG secondary antibody (Molecular Probes, Invitrogen) was diluted 1:500 in blocking solution, and applied for 30 minutes at room temperature. Slides were washed in PBS and covered with Prolong Gold Antifade reagent with DAPI (Invitrogen).

### ***Western blot***

Proteins were extracted with RIPA buffer containing phosphatase- (78428, ThermoScientific, Maltham, MA) and protease-inhibitors (04693124001, Roche, Basel, Switzerland). Twenty-five  $\mu$ g of protein were loaded on 7.5% SDS gels and transferred to PVDF membranes. Membranes were BSA-blocked and hybridized at 4°C overnight with primary antibodies  $\beta$ -catenin 1:2000 (9582, Cell Signaling, Danvers, MA) and  $\alpha$ -tubulin 1:15,000 (T-5168, Sigma-Aldrich, St. Louis, MO). HRP-conjugated secondary antibody was applied at room temperature for 1 hour. Blots were developed using RPN 2132 ECL plus solution (GE Healthcare) and imaged with FUJifilm Laser Image Analyzer (GE Healthcare Life Sciences, Waukesha, WI).

## Supplementary References

1. Chiang DY, Villanueva A, Hoshida Y, Peix J, Newell P, Minguez B, et al. Focal gains of VEGFA and molecular classification of hepatocellular carcinoma. *Cancer Res* 2008;68:6779-88.
2. Toffanin S, Hoshida, Y., Lachenmayer, A., Villanueva, A., Cabellos, L., Minguez, B., Savic, R., Ward, S.C., Thung, S., Chiang, D.Y., Alsinet, C., Tovar, V., Roayaie, S., Schwartz, M., Bruix, J., Waxman, S., Friedman, S.L., Golub, T., Mazzaferro, V., Llovet, J.M. MicroRNA-based Molecular Classification of Hepatocellular Carcinoma and Oncogenic Role of miR-517a. *Gastroenterology* 2011;140(5):1618-28.
3. Qin L, Chen Y, Niu Y, Chen W, Wang Q, Xiao S, et al. A deep investigation into the adipogenesis mechanism: profile of microRNAs regulating adipogenesis by modulating the canonical Wnt/beta-catenin signaling pathway. *BMC Genomics* 2010;11:320.
4. Ma L, Young J, Prabhala H, Pan E, Mestdagh P, Muth D, et al. miR-9, a MYC/MYCN-activated microRNA, regulates E-cadherin and cancer metastasis. *Nat Cell Biol* 2010;12:247-56.
5. Martello G, Zacchigna L, Inui M, Montagner M, Adorno M, Mamidi A, et al. MicroRNA control of Nodal signalling. *Nature* 2007;449:183-8.
6. Carraro G, El-Hashash A, Guidolin D, Tiozzo C, Turcatel G, Young BM, et al. miR-17 family of microRNAs controls FGF10-mediated embryonic lung epithelial branching morphogenesis through MAPK14 and STAT3 regulation of E-Cadherin distribution. *Dev Biol* 2009;333:238-50.
7. Hashimi ST, Fulcher JA, Chang MH, Gov L, Wang S, Lee B. MicroRNA profiling identifies miR-34a and miR-21 and their target genes JAG1 and WNT1 in the coordinate regulation of dendritic cell differentiation. *Blood* 2009;114:404-14.
8. Kapinas K, Kessler C, Ricks T, Gronowicz G, Delany AM. miR-29 modulates Wnt signaling in human osteoblasts through a positive feedback loop. *J Biol Chem.* 2010 Aug 13;285(33):25221-31.
9. Liao Y, Lonnerdal B. Beta-catenin/TCF4 transactivates miR-30e during intestinal cell differentiation. *Cell Mol Life Sci* 2010;67:2969-78.
10. Xi S, Yang M, Tao Y, Xu H, Shan J, Inchauste S, et al. Cigarette smoke induces C/EBP- $\beta$ -mediated activation of miR-31 in normal human respiratory epithelia and lung cancer cells. *PLoS One.* 2010 Oct 29;5(10):e13764.
11. Xu J, Zhu X, Wu L, Yang R, Yang Z, Wang Q, et al. MicroRNA-122 suppresses cell proliferation and induces cell apoptosis in hepatocellular carcinoma by directly targeting Wnt/ $\beta$ -catenin pathway. *Liver Int.* 2012 May;32(5):752-60.
12. Nagel R, le Sage C, Diosdado B, van der Waal M, Oude Vrielink JA, Bolijn A, et al. Regulation of the adenomatous polyposis coli gene by the miR-135 family in colorectal cancer. *Cancer Res* 2008;68:5795-802.
13. Sachdeva M, Mo YY. MicroRNA-145 suppresses cell invasion and metastasis by directly targeting mucin 1. *Cancer Res* 2010;70:378-87.
14. Ji J, Yamashita T, Budhu A, Forgues M, Jia HL, Li C, et al. Identification of microRNA-181 by genome-wide screening as a critical player in EpCAM-positive hepatic cancer stem cells. *Hepatology* 2009;50:472-80.

15. Korpai M, Lee ES, Hu G, Kang Y. The miR-200 family inhibits epithelial-mesenchymal transition and cancer cell migration by direct targeting of E-cadherin transcriptional repressors ZEB1 and ZEB2. *J Biol Chem* 2008;283:14910-4.
16. Thatcher EJ, Paydar I, Anderson KK, Patton JG. Regulation of zebrafish regeneration by microRNAs. *Proc Natl Acad Sci U S A*. 2008 Nov 25;105(47):18384-9.
17. Silver SJ, Hagen JW, Okamura K, Perrimon N, Lai EC. Functional screening identifies miR-315 as a potent activator of Wntless signaling. *Proc Natl Acad Sci U S A* 2007; Nov 13;104(46):18151-6.
18. Ladeiro Y, Couchy G, Balabaud C, Bioulac-Sage P, Pelletier L, Rebouissou S, et al. MicroRNA profiling in hepatocellular tumors is associated with clinical features and oncogene/tumor suppressor gene mutations. *Hepatology* 2008;47:1955-63.
19. Iliopoulos D, Bimpaki EI, Nesterova M, Stratakis CA. MicroRNA signature of primary pigmented nodular adrenocortical disease: clinical correlations and regulation of Wnt signaling. *Cancer Res* 2009;69:3278-82.
